# Supplementary material
Source: publisher figshare collection journal article supplement (https://tandf.figshare.com/articles/dataset/_/16917698)
Supplement: Supplementary file 1 [file 1]

## Sheet: Infection
Infection	ICD10
Endocarditis	I38
	I33.9
	I33.0
	B37.6
	I39
Bacteremia_Sepsis	A41.2
	A41.01
	A41.1
	A41.02
	A41.51
	A41.4
	A41.50
	A41.3
	A41.52
	A41.53
	A41.59
	A41.89
	I26.90
	I40.0
	I76
	R65.21
	R78.81
	R65.20
	A42.7
	A40.3
	A41.9
	A40.9
	B37.7
	R57.8
Osteomyelitis of bone/spine	H05.021
	H05.022
	H05.023
	H05.029
	M46.20
	M46.28
	M86.00
	M86.011
	M86.012
	M86.019
	M86.021
	M86.022
	M86.029
	M86.031
	M86.032
	M86.039
	M86.041
	M86.042
	M86.049
	M86.051
	M86.052
	M86.059
	M86.061
	M86.062
	M86.069
	M86.071
	M86.072
	M86.079
	M86.08
	M86.09
	M86.10
	M86.111
	M86.112
	M86.119
	M86.121
	M86.122
	M86.129
	M86.131
	M86.132
	M86.139
	M86.141
	M86.142
	M86.149
	M86.151
	M86.152
	M86.159
	M86.161
	M86.162
	M86.169
	M86.171
	M86.172
	M86.179
	M86.18
	M86.19
	M86.20
	M86.211
	M86.212
	M86.219
	M86.221
	M86.222
	M86.229
	M86.231
	M86.232
	M86.239
	M86.241
	M86.242
	M86.249
	M86.251
	M86.252
	M86.259
	M86.261
	M86.262
	M86.269
	M86.271
	M86.272
	M86.279
	M86.28
	M86.29
	M86.30
	M86.311
	M86.312
	M86.319
	M86.321
	M86.322
	M86.329
	M86.331
	M86.332
	M86.339
	M86.341
	M86.342
	M86.349
	M86.351
	M86.352
	M86.359
	M86.361
	M86.362
	M86.369
	M86.371
	M86.372
	M86.379
	M86.38
	M86.39
	M86.40
	M86.411
	M86.412
	M86.419
	M86.421
	M86.422
	M86.429
	M86.431
	M86.432
	M86.439
	M86.441
	M86.442
	M86.449
	M86.451
	M86.452
	M86.459
	M86.461
	M86.462
	M86.469
	M86.471
	M86.472
	M86.479
	M86.48
	M86.49
	M86.50
	M86.511
	M86.512
	M86.519
	M86.521
	M86.522
	M86.529
	M86.531
	M86.532
	M86.539
	M86.541
	M86.542
	M86.549
	M86.551
	M86.552
	M86.559
	M86.561
	M86.562
	M86.569
	M86.571
	M86.572
	M86.579
	M86.58
	M86.59
	M86.60
	M86.611
	M86.612
	M86.619
	M86.621
	M86.622
	M86.629
	M86.631
	M86.632
	M86.639
	M86.641
	M86.642
	M86.649
	M86.651
	M86.652
	M86.659
	M86.661
	M86.662
	M86.669
	M86.671
	M86.672
	M86.679
	M86.68
	M86.69
	M86.8X0
	M86.8X1
	M86.8X2
	M86.8X3
	M86.8X4
	M86.8X5
	M86.8X6
	M86.8X7
	M86.8X8
	M86.8X9
	M86.9
	G04.89
	G04.91
	G05.4
Skin and Soft Tissue	L03
	L03.0
	L03.01
	L03.011
	L03.012
	L03.019
	L03.02
	L03.021
	L03.022
	L03.029
	L03.03
	L03.031
	L03.032
	L03.04
	L03.041
	L03.042
	L03.049
	L03.1
	L03.11
	L03.111
	L03.112
	L03.113
	L03.114
	L03.115
	L03.116
	L03.119
	L03.12
	L03.121
	L03.122
	L03.123
	L03.124
	L03.125
	L03.126
	L03.129
	L03.221
	L03.222
	L03.8
	L03.81
	L03.811
	L03.818
	L03.89
	L03.891
	L03.898
	L03.9
	L03.90
	L03.91
	G06.0
	G06.1
	G06.2
	G07
	G09
	K65.1
	K68.12
	K68.19
	K75.0
	L03.039
	L03.319
	L03.329
	L03.317
	L98.8
	M72.6
	K63.0
Septic Arthritis	M00
	M00.0
	M00.00
	M00.01
	M00.011
	M00.012
	M00.019
	M00.02
	M00.021
	M00.022
	M00.029
	M00.03
	M00.031
	M00.032
	M00.039
	M00.04
	M00.041
	M00.042
	M00.049
	M00.05
	M00.051
	M00.052
	M00.059
	M00.06
	M00.061
	M00.062
	M00.069
	M00.07
	M00.071
	M00.072
	M00.079
	M00.08
	M00.09
	M00.1
	M00.10
	M00.11
	M00.111
	M00.112
	M00.119
	M00.12
	M00.121
	M00.122
	M00.129
	M00.13
	M00.131
	M00.132
	M00.139
	M00.14
	M00.141
	M00.142
	M00.149
	M00.15
	M00.151
	M00.152
	M00.159
	M00.16
	M00.161
	M00.162
	M00.169
	M00.17
	M00.171
	M00.172
	M00.179
	M00.18
	M00.19
	M00.2
	M00.20
	M00.21
	M00.211
	M00.212
	M00.219
	M00.22
	M00.221
	M00.222
	M00.229
	M00.23
	M00.231
	M00.232
	M00.239
	M00.24
	M00.241
	M00.242
	M00.249
	M00.25
	M00.251
	M00.252
	M00.259
	M00.26
	M00.261
	M00.262
	M00.269
	M00.27
	M00.271
	M00.272
	M00.279
	M00.28
	M00.29
	M00.8
	M00.80
	M00.81
	M00.811
	M00.812
	M00.819
	M00.82
	M00.821
	M00.822
	M00.829
	M00.83
	M00.831
	M00.832
	M00.839
	M00.84
	M00.841
	M00.842
	M00.849
	M00.85
	M00.851
	M00.852
	M00.859
	M00.86
	M00.861
	M00.862
	M00.869
	M00.87
	M00.871
	M00.872
	M00.879
	M00.88
	M00.89
	M00.9
	M01
	M01.X
	M01.X0
	M01.X1
	M01.X11
	M01.X12
	M01.X19
	M01.X2
	M01.X21
	M01.X22
	M01.X29
	M01.X3
	M01.X31
	M01.X32
	M01.X39
	M01.X4
	M01.X41
	M01.X42
	M01.X49
	M01.X5
	M01.X51
	M01.X52
	M01.X59
	M01.X6
	M01.X61
	M01.X62
	M01.X69
	M01.X7
	M01.X71
	M01.X72
	M01.X79
	M01.X8
	M01.X9

## Sheet: Drugs
Drug Use	Miami ICD-10 Codes
Opiates	F11
	F11.1
	F11.10
	F11.11
	F11.12
	F11.120
	F11.122
	F11.129
	F11.14
	F11.15
	F11.150
	F11.151
	F11.159
	F11.18
	F11.181
	F11.182
	F11.188
	F11.19
	F11.2
	F11.20
	F11.22
	F11.220
	F11.222
	F11.229
	F11.23
	F11.24
	F11.25
	F11.250
	F11.251
	F11.259
	F11.28
	F11.281
	F11.282
	F11.288
	F11.29
	F11.9
	F11.92
	F11.920
	F11.922
	F11.929
	F11.93
	F11.94
	F11.95
	F11.950
	F11.951
	F11.959
	F11.98
	F11.981
	F11.982
	F11.988
	F11.99
Cocaine	F14
	F14.1
	F14.10
	F14.12
	F14.120
	F14.122
	F14.129
	F14.14
	F14.15
	F14.150
	F14.151
	F14.159
	F14.18
	F14.180
	F14.182
	F14.188
	F14.19
	F14.2
	F14.20
	F14.22
	F14.220
	F14.222
	F14.229
	F14.23
	F14.25
	F14.250
	F14.251
	F14.259
	F14.28
	F14.280
	F14.282
	F14.288
	F14.29
	F14.9
	F14.90
	F14.92
	F14.920
	F14.922
	F14.929
	F14.94
	F14.95
	F14.950
	F14.951
	F14.959
	F14.98
	F14.980
	F14.981
	F14.982
	F14.988
	F14.99
Amphetamines	T43.622
	T43.621A
	T43.622A
	T43.622D
	T43.622S
	T43.623
	T43.623A
	T43.623D
	T43.623S
	T43.624
	T43.624A
	T43.624D
	T43.624S
	T43.625
	T43.625A
	T43.625D
	T43.625S
	F15.20
	F15.21
	F15.10
	F15.11
Other Psychoactive	F19
	F19.1
	F19.10
	F19.11
	F19.12
	F19.120
	F19.121
	F19.122
	F19.129
	F19.14
	F19.15
	F19.150
	F19.151
	F19.159
	F19.16
	F19.17
	F19.18
	F19.180
	F19.181
	F19.182
	F19.188
	F19.19
	F19.2
	F19.20
	F19.21
	F19.22
	F19.220
	F19.221
	F19.222
	F19.229
	F19.23
	F19.230
	F19.231
	F19.232
	F19.239
	F19.24
	F19.25
	F19.250
	F19.251
	F19.259
	F19.26
	F19.27
	F19.28
	F19.280
	F19.281
	F19.282
	F19.288
	F19.29
	F19.9
	F19.90
	F19.92
	F19.920
	F19.921
	F19.922
	F19.929
	F19.93
	F19.930
	F19.931
	F19.932
	F19.939
	F19.94
	F19.95
	F19.950
	F19.951
	F19.959
	F19.96
	F19.97
	F19.98
	F19.980
	F19.981
	F19.982
	F19.988
	F19.99
Overdose	T40
	T40.0
	T40.0X
	T40.0X1
	T40.0X1A
	T40.0X1D
	T40.0X1S
	T40.0X2
	T40.0X2A
	T40.0X2D
	T40.0X2S
	T40.0X3
	T40.0X3A
	T40.0X3D
	T40.0X3S
	T40.0X4
	T40.0X4A
	T40.0X4D
	T40.0X4S
	T40.0X5
	T40.0X5A
	T40.0X5D
	T40.0X5S
	T40.1
	T40.1X
	T40.1X1
	T40.1X1A
	T40.1X1D
	T40.1X1S
	T40.1X2
	T40.1X2A
	T40.1X2D
	T40.1X2S
	T40.1X3
	T40.1X3A
	T40.1X3D
	T40.1X3S
	T40.1X4
	T40.1X4A
	T40.1X4D
	T40.1X4S
	T40.2
	T40.2X
	T40.2X1
	T40.2X1A
	T40.2X1D
	T40.2X1S
	T40.2X2
	T40.2X2A
	T40.2X2D
	T40.2X2S
	T40.2X3
	T40.2X3A
	T40.2X3D
	T40.2X3S
	T40.2X4
	T40.2X4A
	T40.2X4D
	T40.2X4S
	T40.2X5
	T40.2X5A
	T40.2X5D
	T40.2X5S
	T40.3
	T40.3X
	T40.3X1
	T40.3X1A
	T40.3X1D
	T40.3X1S
	T40.3X2
	T40.3X2A
	T40.3X2D
	T40.3X2S
	T40.3X3
	T40.3X3A
	T40.3X3D
	T40.3X3S
	T40.3X4
	T40.3X4A
	T40.3X4D
	T40.3X5
	T40.3X5A
	T40.3X5D
	T40.3X5S
	T40.4
	T40.4X
	T40.4X1
	T40.4X1A
	T40.1D
	T40.4X1S
	T40.4X2
	T40.4X2A
	T40.4X2D
	T40.4X2S
	T40.4X3
	T40.4X3A
	T40.4X3D
	T40.4X3S
	T40.4X4
	T40.4X4A
	T40.4X4D
	T40.4X4S
	T40.4X5
	T40.4X5A
	T40.4X5D
	T40.4X5S
	T40.5
	T40.5X
	T40.5X1
	T40.5X1A
	T40.5X1D
	T40.5X1S
	T40.5X2
	T40.5X2A
	T40.5X2D
	T40.5X2S
	T40.5X3
	T40.5X3A
	T40.5X3D
	T40.5X3S
	T40.5X4
	T40.5X4A
	T40.5X4D
	T40.5X4S
	T40.5X5
	T40.5X5A
	T40.5X5D
	T40.5X5S
	T40.6
	T40.60
	T40.601
	T40.601A
	T40.601D
	T40.601S
	T40.602
	T40.602A
	T40.602D
	T40.602S
	T40.603
	T40.603A
	T40.603D
	T40.603S
	T40.604
	T40.604A
	T40.604D
	T40.604S
	T40.605
	T40.605A
	T40.605D
	T40.605S
	T40.69
	T40.691
	T40.691A
	T40.691D
	T40.691S
	T40.692
	T40.692A
	T40.692D
	T40.692S
	T40.693
	T40.693A
	T40.693D
	T40.693S
	T40.694
	T40.694A
	T40.694D
	T40.694S
	T40.695
	T40.695A
	T40.695D
	T40.695S
